# Supplementary material for: Chemical Nature of Metals and Metal-Based Materials in Inactivation of Viruses
Source: MDPI journal article supplement (doi:10.3390/nano12142345), 2022-07-08
Supplement: s1 [file s1]

# Chemical Nature of Metals and Metal-Based Materials in Inactivation of Viruses

Haozhong Tian <sup>1,2</sup>, Bin He <sup>1,2,3</sup>, Yongguang Yin <sup>1,2,3</sup>, Lihong Liu <sup>1</sup>, Jianbo Shi <sup>1,2,4</sup>,  
Ligang Hu <sup>1,2,3,4,\*</sup> and Guibin Jiang <sup>1,2,3</sup>

- <sup>1</sup> State Key Laboratory of Environmental Chemistry and Ecotoxicology, Research Center for Eco-Environmental Sciences, Chinese Academy of Sciences, 18 Shuangqing Road, Beijing 100085, China; hztian\_st@rcees.ac.cn (H.T.); bhe@rcees.ac.cn (B.H.); ygyin@rcees.ac.cn (Y.Y.); lhliu@rcees.ac.cn (L.L.); jbsshi@rcees.ac.cn (J.S.); gbjiang@rcees.ac.cn (G.J.)
- <sup>2</sup> College of Resources and Environment, University of Chinese Academy of Sciences, Beijing 100049, China
- <sup>3</sup> School of Environment, Hangzhou Institute for Advanced Study, University of Chinese Academy of Sciences, Hangzhou 310024, China
- <sup>4</sup> School of Environment and Health, Jiangnan University, Wuhan 430056, China
- \* Correspondence: author: lgghu@rcees.ac.cn

**Table S1.** Selected the chelation equilibrium constants between  $M^{n+}$  and EDTA.

| Atomic number | Metal ion        | lg K <sub>0</sub> | Atomic number | Metal ion        | lg K <sub>0</sub> |
|---------------|------------------|-------------------|---------------|------------------|-------------------|
| 19            | K <sup>+</sup>   | 1.51 <sup>a</sup> | 30            | Zn <sup>2+</sup> | 18.22             |
| 11            | Na <sup>+</sup>  | 2.72              | 48            | Cd <sup>2+</sup> | 18.24             |
| 3             | Li <sup>+</sup>  | 3.71              | 13            | Al <sup>3+</sup> | 19.10             |
| 47            | Ag <sup>+</sup>  | 8.01              | 28            | Ni <sup>2+</sup> | 20.14             |
| 29            | Cu <sup>+</sup>  | 9.15              | 29            | Cu <sup>2+</sup> | 20.40             |
| 56            | Ba <sup>2+</sup> | 9.43              | 22            | Ti <sup>3+</sup> | 23.82             |
| 12            | Mg <sup>2+</sup> | 10.43             | 24            | Cr <sup>3+</sup> | 25.77             |
| 20            | Ca <sup>2+</sup> | 12.39             | 22            | Ti <sup>4+</sup> | 26.63             |
| 23            | V <sup>2+</sup>  | 14.34             | 25            | Mn <sup>3+</sup> | 27.23             |
| 25            | Mn <sup>2+</sup> | 15.54             | 26            | Fe <sup>3+</sup> | 27.43             |
| 26            | Fe <sup>2+</sup> | 15.86             | 23            | V <sup>3+</sup>  | 28.37             |
| 27            | Co <sup>2+</sup> | 17.98             | 27            | Co <sup>3+</sup> | 43.78             |
| 50            | Sn <sup>2+</sup> | 18.17             |               |                  |                   |

<sup>a</sup> All data were measured under standard conditions (273.15 K, 101 kPa).

**Table S2.** Antiviral rate of various  $M^{n+}$ .

| Metal ion        | lg $K_0$ | Antiviral rate ( $\text{mM}^{-1}\cdot\text{h}^{-1}$ ) |                       |                       |                       | Mean  |
|------------------|----------|-------------------------------------------------------|-----------------------|-----------------------|-----------------------|-------|
|                  |          | Example A                                             | Example B             | Example C             | Example D             |       |
| $\text{K}^+$     | 1.51     | 0                                                     |                       |                       |                       | 0     |
| $\text{Na}^+$    | 2.72     | 0                                                     |                       |                       |                       | 0     |
| $\text{Li}^+$    | 3.71     | 0.003 <sup>[1]</sup>                                  | 0.005 <sup>[2]</sup>  | 0.005 <sup>[3]</sup>  | 0.080 <sup>[4]</sup>  | 0.023 |
| $\text{Ag}^+$    | 8.01     | 0.101 <sup>[5]</sup>                                  | 0.750 <sup>[5]</sup>  | 2.080 <sup>[6]</sup>  |                       | 0.977 |
| $\text{Cu}^+$    | 9.15     | 0.314 <sup>[7]</sup>                                  | 1.500 <sup>[8]</sup>  | 6.190 <sup>[9]</sup>  |                       | 2.668 |
| $\text{Ba}^{2+}$ | 9.43     | 0                                                     |                       |                       |                       | 0     |
| $\text{Mg}^{2+}$ | 10.43    | 0 <sup>[10]</sup>                                     | 0.064 <sup>[11]</sup> |                       |                       | 0.032 |
| $\text{Ca}^{2+}$ | 12.39    | 0                                                     |                       |                       |                       | 0     |
| $\text{V}^{2+}$  | 14.34    | 0                                                     |                       |                       |                       | 0     |
| $\text{Mn}^{2+}$ | 15.54    | 0                                                     |                       |                       |                       | 0     |
| $\text{Fe}^{2+}$ | 15.86    | 0.090 <sup>[12]</sup>                                 | 0.605 <sup>[6]</sup>  |                       |                       | 0.348 |
| $\text{Co}^{2+}$ | 17.98    | 0                                                     |                       |                       |                       | 0     |
| $\text{Sn}^{2+}$ | 18.17    | 0                                                     |                       |                       |                       | 0     |
| $\text{Zn}^{2+}$ | 18.22    | 0 <sup>[13]</sup>                                     | 0.135 <sup>[14]</sup> | 0.169 <sup>[11]</sup> | 0.250 <sup>[15]</sup> | 0.138 |
| $\text{Cd}^{2+}$ | 18.24    | 0                                                     |                       |                       |                       | 0     |
| $\text{Al}^{3+}$ | 19.1     | 0 <sup>[10]</sup>                                     | 0.343 <sup>[6]</sup>  |                       |                       | 0.171 |
| $\text{Ni}^{2+}$ | 20.14    | 0 <sup>[16]</sup>                                     | 0.033 <sup>[6]</sup>  |                       |                       | 0.016 |
| $\text{Cu}^{2+}$ | 20.4     | 0.029 <sup>[5]</sup>                                  | 1.100 <sup>[6]</sup>  | 5.083 <sup>[17]</sup> |                       | 2.070 |
| $\text{Ti}^{3+}$ | 23.82    | 0                                                     |                       |                       |                       | 0     |
| $\text{Cr}^{3+}$ | 25.77    | 0 <sup>[18]</sup>                                     | 0.114 <sup>[18]</sup> |                       |                       | 0.057 |
| $\text{Ti}^{4+}$ | 26.63    | 0                                                     |                       |                       |                       | 0     |
| $\text{Mn}^{3+}$ | 27.23    | 0                                                     |                       |                       |                       | 0     |
| $\text{Fe}^{3+}$ | 27.43    | 0.006 <sup>[18]</sup>                                 | 0.041 <sup>[18]</sup> |                       |                       | 0.023 |
| $\text{V}^{3+}$  | 28.37    | 0                                                     |                       |                       |                       | 0     |

**Table S3.** Selected the hydrated radius and ionic potential of  $M^{n+}$ .

| Atomic number | Metal ion        | Hydrated radius (nm) | Ionic potential (nm <sup>-1</sup> ) <sup>a</sup><br><sup>b</sup> | Reference |
|---------------|------------------|----------------------|------------------------------------------------------------------|-----------|
| 3             | Li <sup>+</sup>  | 0.382                | 2.618                                                            | [19]      |
| 11            | Na <sup>+</sup>  | 0.358                | 2.793                                                            | [19]      |
| 47            | Ag <sup>+</sup>  | 0.341                | 2.933                                                            | [19]      |
| 19            | K <sup>+</sup>   | 0.331                | 3.021                                                            | [19]      |
| 25            | Mn <sup>2+</sup> | 0.438                | 4.566                                                            | [20]      |
| 30            | Zn <sup>2+</sup> | 0.430                | 4.651                                                            | [19]      |
| 12            | Mg <sup>2+</sup> | 0.428                | 4.673                                                            | [19]      |
| 26            | Fe <sup>2+</sup> | 0.428                | 4.673                                                            | [20]      |
| 48            | Cd <sup>2+</sup> | 0.426                | 4.695                                                            | [19]      |
| 27            | Co <sup>2+</sup> | 0.423                | 4.728                                                            | [20]      |
| 29            | Cu <sup>2+</sup> | 0.419                | 4.773                                                            | [20]      |
| 20            | Ca <sup>2+</sup> | 0.412                | 4.854                                                            | [19]      |
| 28            | Ni <sup>2+</sup> | 0.404                | 4.950                                                            | [20]      |
| 56            | Ba <sup>2+</sup> | 0.404                | 4.950                                                            | [20]      |
| 13            | Al <sup>3+</sup> | 0.480                | 6.250                                                            | [19]      |
| 24            | Cr <sup>3+</sup> | 0.461                | 6.508                                                            | [20]      |
| 26            | Fe <sup>3+</sup> | 0.457                | 6.565                                                            | [20]      |

<sup>a</sup> Calculated by  $\Phi = Z/r$ .<sup>b</sup> Calculated from the hydrated radius instead of ionic radius.

**Table S4.** Selected the redox couple of metallic element.

| <b>Atomic number</b> | <b>Redox couple</b>  | <b>E<sup>⊖</sup> (V)</b> | <b>Atomic number</b> | <b>Redox couple</b>                | <b>E<sup>⊖</sup> (V)</b> |
|----------------------|----------------------|--------------------------|----------------------|------------------------------------|--------------------------|
| 20                   | Ca <sup>2+</sup> /Ca | −2.84                    | 48                   | Cd <sup>2+</sup> /Cd               | −0.40                    |
| 13                   | Al <sup>3+</sup> /Al | −1.68                    | 27                   | Co <sup>2+</sup> /Co               | −0.28                    |
| 12                   | Mg <sup>2+</sup> /Mg | −2.36                    | 28                   | Ni <sup>2+</sup> /Ni               | −0.26                    |
| 22                   | Ti <sup>2+</sup> /Ti | −1.63                    | 50                   | Sn <sup>2+</sup> /Sn               | −0.14                    |
| 3                    | Li <sup>+</sup> /Li  | −3.04                    | 82                   | Pb <sup>2+</sup> /Pb               | −0.13                    |
| 19                   | K <sup>+</sup> /K    | −2.93                    | 26                   | Fe <sup>3+</sup> /Fe               | −0.04                    |
| 11                   | Na <sup>+</sup> /Na  | −2.71                    | 50                   | Sn <sup>4+</sup> /Sn <sup>2+</sup> | 0.15                     |
| 25                   | Mn <sup>2+</sup> /Mn | −1.18                    | 29                   | Cu <sup>+</sup> /Cu                | 0.52                     |
| 23                   | V <sup>2+</sup> /V   | −1.13                    | 29                   | Cu <sup>2+</sup> /Cu               | 0.34                     |
| 24                   | Cr <sup>3+</sup> /Cr | −0.74                    | 47                   | Ag <sup>+</sup> /Ag                | 0.80                     |
| 30                   | Zn <sup>2+</sup> /Zn | −0.76                    | 78                   | Pt <sup>2+</sup> /Pt               | 1.19                     |
| 26                   | Fe <sup>2+</sup> /Fe | −0.44                    | 79                   | Au <sup>3+</sup> /Au               | 1.52                     |

**Table S5.** Antiviral rate of metal elements with different valence states.

| Valence          | Antiviral rate (mM <sup>-1</sup> ·h <sup>-1</sup> ) |                       |                       |                       | Mean  |
|------------------|-----------------------------------------------------|-----------------------|-----------------------|-----------------------|-------|
|                  | Example A                                           | Example B             | Example C             | Example D             |       |
| Fe               | 2.311 <sup>[21]</sup>                               | 3.807 <sup>[22]</sup> | 4.552 <sup>[23]</sup> |                       | 3.557 |
| Fe <sup>2+</sup> | 0.090 <sup>[12]</sup>                               | 0.605 <sup>[6]</sup>  |                       |                       | 0.347 |
| Fe <sup>3+</sup> | 0.006 <sup>[18]</sup>                               | 0.041 <sup>[18]</sup> |                       |                       | 0.023 |
| Cu <sup>+</sup>  | 0.314 <sup>[7]</sup>                                | 1.500 <sup>[8]</sup>  | 6.190 <sup>[9]</sup>  |                       | 2.668 |
| Cu <sup>2+</sup> | 0.029 <sup>[5]</sup>                                | 1.100 <sup>[6]</sup>  | 5.083 <sup>[17]</sup> |                       | 2.070 |
| Ag               | 1.421 <sup>[24]</sup>                               | 3.613 <sup>[25]</sup> | 4.201 <sup>[26]</sup> |                       | 3.079 |
| Ag <sup>+</sup>  | 0.101 <sup>[5]</sup>                                | 0.750 <sup>[5]</sup>  | 2.080 <sup>[6]</sup>  |                       | 0.977 |
| Au               | 0.576 <sup>[27]</sup>                               | 5.923 <sup>[28]</sup> | 7.798 <sup>[29]</sup> | 9.319 <sup>[29]</sup> | 5.904 |
| Au <sup>3+</sup> | 0                                                   |                       |                       |                       | 0     |

## References

1. Shokeen, K.; Srivathsan, A.; Kumar, S. Lithium chloride functions as Newcastle disease virus-induced ER-stress modulator and confers anti-viral effect. *Virus Research* **2021**, 292, 198223, <https://doi.org/10.1016/j.virusres.2020.198223>.
2. Li, H.-j.; Gao, D.-s.; Li, Y.-t.; Wang, Y.-s.; Liu, H.-y.; Zhao, J. Antiviral effect of lithium chloride on porcine epidemic diarrhea virus in vitro. *Research in Veterinary Science* **2018**, 118, 288-294, <https://doi.org/10.1016/j.rvsc.2018.03.002>.
3. Ren, X.; Meng, F.; Yin, J.; Li, G.; Li, X.; Wang, C.; Herrler, G. Action mechanisms of lithium chloride on cell infection by transmissible gastroenteritis coronavirus. *PloS one* **2011**, 6, e18669, doi:10.1371/journal.pone.0018669.
4. Sui, X.; Yin, J.; Ren, X. Antiviral effect of diammonium glycyrrhizinate and lithium chloride on cell infection by pseudorabies herpesvirus. *Antiviral Research* **2010**, 85, 346-353, <https://doi.org/10.1016/j.antiviral.2009.10.014>.
5. Minoshima, M.; Lu, Y.; Kimura, T.; Nakano, R.; Ishiguro, H.; Kubota, Y.; Hashimoto, K.; Sunada, K. Comparison of the antiviral effect of solid-state copper and silver compounds. *Journal of Hazardous Materials* **2016**, 312, 1-7, <https://doi.org/10.1016/j.jhazmat.2016.03.023>.
6. Molan, K.; Rahmani, R.; Krklec, D.; Brojan, M.; Stopar, D. Phi 6 Bacteriophage Inactivation by Metal Salts, Metal Powders, and Metal Surfaces. *Viruses* **2022**, 14, doi:10.3390/v14020204.
7. Sunada, K.; Minoshima, M.; Hashimoto, K. Highly efficient antiviral and antibacterial activities of solid-state cuprous compounds. *Journal of Hazardous Materials* **2012**, 235-236, 265-270, <https://doi.org/10.1016/j.jhazmat.2012.07.052>.
8. Takeda, Y.; Jamsransuren, D.; Nagao, T.; Fukui, Y.; Matsuda, S.; Ogawa, H.; Johnson Karyn, N. Application of Copper Iodide Nanoparticle-Doped Film and Fabric To Inactivate SARS-CoV-2 via the Virucidal Activity of Cuprous Ions (Cu<sup>+</sup>). *Applied and Environmental Microbiology* **87**, e01824-01821, doi:10.1128/AEM.01824-21.
9. Fujimori, Y.; Sato, T.; Hayata, T.; Nagao, T.; Nakayama, M.; Nakayama, T.; Sugamata, R.; Suzuki, K. Novel Antiviral Characteristics of Nanosized Copper(I) Iodide Particles Showing Inactivation Activity against 2009 Pandemic H1N1 Influenza Virus. *Applied and Environmental Microbiology* **2012**, 78, 951-955, doi:10.1128/AEM.06284-11.
10. Lukasik, J.; Scott Troy, M.; Andryshak, D.; Farrah Samuel, R. Influence of Salts on Virus Adsorption to Microporous Filters. *Applied and Environmental Microbiology* **2000**, 66, 2914-2920, doi:10.1128/AEM.66.7.2914-2920.2000.
11. Wei, Z.; Burwinkel, M.; Palissa, C.; Ephraim, E.; Schmidt, M.F.G. Antiviral activity of zinc salts against transmissible gastroenteritis virus in vitro. *Veterinary Microbiology* **2012**, 160, 468-472, <https://doi.org/10.1016/j.vetmic.2012.06.019>.
12. Tong, T.; Deng, S.; Zhang, X.; Fang, L.; Liang, J.; Xiao, S. Inhibitory effect and mechanism of gelatin stabilized ferrous sulfide nanoparticles on porcine reproductive and respiratory syndrome virus. *Journal of nanobiotechnology* **2022**, 20, 70, doi:10.1186/s12951-022-01281-4.
13. Sengupta, D.; Timilsina, U.; Mazumder, Z.H.; Mukherjee, A.; Ghimire, D.; Markandey, M.; Upadhyaya, K.; Sharma, D.; Mishra, N.; Jha, T.; et al. Dual activity of amphiphilic Zn(II) nitroporphyrin derivatives as HIV-1 entry inhibitors and in cancer photodynamic therapy. *European Journal of Medicinal Chemistry* **2019**, 174, 66-75, <https://doi.org/10.1016/j.ejmech.2019.04.051>.
14. Kaushik, N.; Subramani, C.; Anang, S.; Muthumohan, R.; Shalimar, n.; Nayak, B.; Ranjith-

- Kumar, C.T.; Surjit, M.; Ou, J.H.J. Zinc Salts Block Hepatitis E Virus Replication by Inhibiting the Activity of Viral RNA-Dependent RNA Polymerase. *Journal of Virology* **91**, e00754-00717, doi:10.1128/JVI.00754-17.
15. Horie, M.; Ogawa, H.; Yoshida, Y.; Yamada, K.; Hara, A.; Ozawa, K.; Matsuda, S.; Mizota, C.; Tani, M.; Yamamoto, Y.; et al. Inactivation and morphological changes of avian influenza virus by copper ions. *Archives of Virology* **2008**, *153*, 1467, doi:10.1007/s00705-008-0154-2.
  16. Lin, Y.-C.; Chang, C.-H. In vitro inhibition of enterovirus 71 infection with a nickel ion/chitosan microcomposite. *Virus Research* **2014**, *190*, 17-24, <https://doi.org/10.1016/j.virusres.2014.06.012>.
  17. Soliman, M.Y.M.; Medema, G.; Bonilla, B.E.; Brouns, S.J.J.; van Halem, D. Inactivation of RNA and DNA viruses in water by copper and silver ions and their synergistic effect. *Water Research X* **2020**, *9*, 100077, <https://doi.org/10.1016/j.wroa.2020.100077>.
  18. Terpiłowska, S.; Siwicki, A.K. Chromium(III) and iron(III) inhibits replication of DNA and RNA viruses. *BioMetals* **2017**, *30*, 565-574, doi:10.1007/s10534-017-0027-9.
  19. Tansel, B. Significance of thermodynamic and physical characteristics on permeation of ions during membrane separation: Hydrated radius, hydration free energy and viscous effects. *Separation and Purification Technology* **2012**, *86*, 119-126, <https://doi.org/10.1016/j.seppur.2011.10.033>.
  20. Nightingale, E.R. Phenomenological Theory of Ion Solvation. Effective Radii of Hydrated Ions. *The Journal of Physical Chemistry* **1959**, *63*, 1381-1387, doi:10.1021/j150579a011.
  21. Cheng, R.; Zhang, Y.; Zhang, T.; Hou, F.; Cao, X.; Shi, L.; Jiang, P.; Zheng, X.; Wang, J. The inactivation of bacteriophages MS2 and PhiX174 by nanoscale zero-valent iron: Resistance difference and mechanisms. *Frontiers of Environmental Science & Engineering* **2022**, *16*, 108, doi:10.1007/s11783-022-1529-4.
  22. Cheng, R.; Li, G.; Cheng, C.; Liu, P.; Shi, L.; Ma, Z.; Zheng, X. Removal of bacteriophage f2 in water by nanoscale zero-valent iron and parameters optimization using response surface methodology. *Chemical Engineering Journal* **2014**, *252*, 150-158, <https://doi.org/10.1016/j.cej.2014.05.003>.
  23. Yuan, D.; Zhai, L.; Zhang, X.; Cui, Y.; Wang, X.; Zhao, Y.; Xu, H.; He, L.; Yan, C.; Cheng, R.; et al. Study on the characteristics and mechanism of bacteriophage MS2 inactivated by bacterial cellulose supported nanoscale zero-valent iron. *Journal of Cleaner Production* **2020**, *270*, 122527, <https://doi.org/10.1016/j.jclepro.2020.122527>.
  24. Morris, D.; Ansar, M.; Speshock, J.; Ivanciuc, T.; Qu, Y.; Casola, A.; Garofalo, R.P. Antiviral and Immunomodulatory Activity of Silver Nanoparticles in Experimental RSV Infection. *Viruses* **2019**, *11*, doi:10.3390/v11080732.
  25. He, Q.; Lu, J.; Liu, N.; Lu, W.; Li, Y.; Shang, C.; Li, X.; Hu, L.; Jiang, G. Antiviral Properties of Silver Nanoparticles against SARS-CoV-2: Effects of Surface Coating and Particle Size. *Nanomaterials* **2022**, *12*, doi:10.3390/nano12060990.
  26. Lv, X.; Wang, P.; Bai, R.; Cong, Y.; Suo, S.; Ren, X.; Chen, C. Inhibitory effect of silver nanomaterials on transmissible virus-induced host cell infections. *Biomaterials* **2014**, *35*, 4195-4203, <https://doi.org/10.1016/j.biomaterials.2014.01.054>.
  27. Kim, J.; Yeom, M.; Lee, T.; Kim, H.O.; Na, W.; Kang, A.; Lim, J.W.; Park, G.; Park, C.; Song, D.; et al. Porous gold nanoparticles for attenuating infectivity of influenza A virus. *Journal of nanobiotechnology* **2020**, *18*, 54, doi:10.1186/s12951-020-00611-8.
  28. Meléndez-Villanueva, M.A.; Morán-Santibañez, K.; Martínez-Sanmiguel, J.J.; Rangel-

- López, R.; Garza-Navarro, M.A.; Rodríguez-Padilla, C.; Zarate-Triviño, D.G.; Trejo-Ávila, L.M. Virucidal Activity of Gold Nanoparticles Synthesized by Green Chemistry Using Garlic Extract. *Viruses* **2019**, *11*, doi:10.3390/v11121111.
29. Halder, A.; Das, S.; Ojha, D.; Chattopadhyay, D.; Mukherjee, A. Highly monodispersed gold nanoparticles synthesis and inhibition of herpes simplex virus infections. *Materials Science and Engineering: C* **2018**, *89*, 413-421, <https://doi.org/10.1016/j.msec.2018.04.005>.
